# Supplementary material
Source: HighWire-hosted journal article supplement (https://ebm.bmj.com/content/28/3/164)
Supplement: inline-supplementary-material-1 [file inline-supplementary-material-1.pdf]

**Supplementary Table 2:** List of excluded studies. Papers excluded as duplicates are not shown.

| First author, year                 | Title                                                                                                                                                  | Reason for exclusion                                       |
|------------------------------------|--------------------------------------------------------------------------------------------------------------------------------------------------------|------------------------------------------------------------|
| Saulle <i>et al.</i> , 2021        | Impact of social distancing for COVID-19 on youths' physical health: a systematic review of the literature                                             | Not in English                                             |
| Freiberg <i>et al.</i> , 2021      | Impact of wearing face masks in public to prevent infectious diseases on the psychosocial development in children and adolescents: a systematic review | Not in English                                             |
| Guarinoni <i>et al.</i> , 2020     | School nurse in the restrain of pandemics and the re-opening school. An integrative review                                                             | Does not answer any of our 4 posed questions (see Methods) |
| Imtiaz Memon <i>et al.</i> , 2020  | The effect of quarantine on the emotional well-being of kids: a systematic review                                                                      | Not a systematic review                                    |
| -                                  | Integrative Medicine and Health Symposium Abstracts                                                                                                    | Not a systematic review                                    |
| Wei <i>et al.</i> , 2021           | Reluctance towards digital image sharing and challenges for tele dermatology                                                                           | Does not answer any of our 4 posed questions (see Methods) |
| Clare Vigilar <i>et al.</i> , 2021 | The Impact of COVID-19 Virtual Schooling on Child and Adolescent Mental Health: Considerations for Force Readiness                                     | Does not answer any of our 4 posed questions (see Methods) |
| Sheen <i>et al.</i> , 2020         | Screen time in the context of COVID-19: the good, the bad, and the ugly                                                                                | Not a systematic review                                    |
| McGowan <i>et al.</i> , 2020       | Challenges with managing children and adolescents with ADHD during the COVID-19 pandemic: a review of the literature                                   | Not a systematic review                                    |
| Sheen <i>et al.</i> , 2020         | Impact of COVID-19-related school closures on children and adolescents worldwide: a literature review                                                  | Not a systematic review                                    |
| Wu <i>et al.</i> , 2020            | Medical education in the time of COVID-19: a literature review on e-learning                                                                           | Does not answer any of our 4 posed questions (see Methods) |
| Gannon <i>et al.</i> , 2021        | Impact of the COVID-19 Pandemic on Prescribing for Youth With Autism Spectrum Disorder: A Review of the Literature                                     | Does not answer any of our 4 posed questions (see Methods) |
| Joshi <i>et al.</i> , 2021         | A cost-benefit analysis of a flexible bronchoscope vis-a-vis life of a doctor in COVID-19 era                                                          | Does not answer any of our 4 posed questions (see Methods) |
| Smith <i>et al.</i> , 2021         | A health and justice lab to address cancer related health disparities and social determinants of health in                                             | Does not answer any of our 4 posed questions (see Methods) |

|                                  |                                                                                                                                                                                                |                                                            |
|----------------------------------|------------------------------------------------------------------------------------------------------------------------------------------------------------------------------------------------|------------------------------------------------------------|
|                                  | marginalized communities: The Cancer Health Justice Lab                                                                                                                                        |                                                            |
| Dragioti <i>et al.</i> , 2021    | A large-scale meta-analytic atlas of mental health problems prevalence during the COVID-19 early pandemic                                                                                      | Does not answer any of our 4 posed questions (see Methods) |
| Khatami <i>et al.</i> , 2020     | A meta-analysis of accuracy and sensitivity of chest CT and RT-PCR in COVID-19 diagnosis.                                                                                                      | Does not answer any of our 4 posed questions (see Methods) |
| Ezeonu <i>et al.</i> , 2021      | A rapid review of the reopening of schools in this COVID-19 pandemic? How ready are we in Nigeria?                                                                                             | Does not answer any of our 4 posed questions (see Methods) |
| Pillay <i>et al.</i> , 2021      | A review exploring convergence insufficiency in younger populations and e-devices in the digital era                                                                                           | Does not answer any of our 4 posed questions (see Methods) |
| Walsh <i>et al.</i> , 2021       | A systematic review of current teleophthalmology services in New Zealand compared to the four comparable countries of the United Kingdom, Australia, United States of America (Usa) and Canada | Does not answer any of our 4 posed questions (see Methods) |
| Henry-Blake <i>et al.</i> , 2021 | A systematic review of international guidelines regarding the role of radiography in the diagnosis of osteoarthritis                                                                           | Does not answer any of our 4 posed questions (see Methods) |
| Byrne <i>et al.</i> , 2021       | A systematic review of medical student willingness to volunteer and preparedness for pandemics and disasters                                                                                   | Does not answer any of our 4 posed questions (see Methods) |
| Zahedi <i>et al.</i> , 2021      | A systematic review of screen-time literature to inform educational policy and practice during COVID-19.                                                                                       | Does not answer any of our 4 posed questions (see Methods) |
| Ashraf <i>et al.</i> , 2021      | A Systematic Review of Systematic Reviews on Blended Learning: Trends, Gaps and Future Directions.                                                                                             | Does not answer any of our 4 posed questions (see Methods) |
| Nigam <i>et al.</i> , 2021       | A Systematic Review on AI-based Proctoring Systems: Past, Present and Future.                                                                                                                  | Does not answer any of our 4 posed questions (see Methods) |
| Hutton <i>et al.</i> , 2021      | A Systematic Scoping Review of the Impacts of Community Food Production Initiatives in Kenya, Cameroon, and South Africa.                                                                      | Does not answer any of our 4 posed questions (see Methods) |
| Hempel <i>et al.</i> , 2021      | Allocation of scarce resources in a pandemic: rapid systematic review update of strategies for policymakers                                                                                    | Does not answer any of our 4 posed questions (see Methods) |
| Wang <i>et al.</i> , 2021        | Anxiety, depression, and stress prevalence among college students during the COVID-19 pandemic: A systematic review and meta-analysis                                                          | Does not answer any of our 4 posed questions (see Methods) |

|                                         |                                                                                                                                                          |                                                            |
|-----------------------------------------|----------------------------------------------------------------------------------------------------------------------------------------------------------|------------------------------------------------------------|
| Asadzadeh <i>et al.</i> , 2021          | Applications of Virtual and Augmented Reality in Infectious Disease Epidemics with a Focus on the COVID-19 Outbreak.                                     | Does not answer any of our 4 posed questions (see Methods) |
| Chhibber <i>et al.</i> , 2021           | Assessment of health equity consideration in masking/PPE policies to contain COVID-19 using PROGRESS-plus framework: a systematic review.                | Does not answer any of our 4 posed questions (see Methods) |
| Pei <i>et al.</i> , 2021                | Association of frailty status with adverse clinical outcomes in patients with COVID-19: Protocol for a systematic review and dose-response meta-analysis | Does not answer any of our 4 posed questions (see Methods) |
| Ravindra <i>et al.</i> , 2022           | Asymptomatic infection and transmission of COVID-19 among clusters: systematic review and meta-analysis.                                                 | Does not answer any of our 4 posed questions (see Methods) |
| Tariku <i>et al.</i> , 2020             | Available Evidence and Ongoing Hypothesis on Corona Virus (COVID-19) and Psychosis: Is Corona Virus and Psychosis Related? A Narrative Review.           | Does not answer any of our 4 posed questions (see Methods) |
| Gracia-Ramos <i>et al.</i> , 2021       | Can the SARS-CoV-2 infection trigger systemic lupus erythematosus? A case-based review                                                                   | Does not answer any of our 4 posed questions (see Methods) |
| Ahmed <i>et al.</i> , 2021              | Canadian Conference for the Advancement of Surgical Education (C-CASE) 2021: Post-Pandemic and Beyond Virtual Conference                                 | Does not answer any of our 4 posed questions (see Methods) |
| van Hattum <i>et al.</i> , 2021         | Cardiac abnormalities in athletes after SARS-CoV-2 infection: a systematic review.                                                                       | Does not answer any of our 4 posed questions (see Methods) |
| Rodriguez-Gonzalez <i>et al.</i> , 2020 | Cardiovascular impact of COVID-19 with a focus on children: A systematic review.                                                                         | Does not answer any of our 4 posed questions (see Methods) |
| Ludvigsson <i>et al.</i> , 2021         | Case report and systematic review suggest that children may experience similar long-term effects to adults after clinical COVID-19.                      | Does not answer any of our 4 posed questions (see Methods) |
| Lee <i>et al.</i> , 2021                | Changes in undergraduate medical education due to COVID-19: a systematic review.                                                                         | Does not answer any of our 4 posed questions (see Methods) |
| Gomez <i>et al.</i> , 2021              | Child-Focused Mental Health Interventions for Disasters Recovery: A Rapid Review of Experiences to Inform Return-to-School Strategies After COVID-19     | Does not answer any of our 4 posed questions (see Methods) |
| Ludvigsson <i>et al.</i> , 2020         | Children are unlikely to be the main drivers of the COVID-19 pandemic - A systematic review                                                              | Does not answer any of our 4 posed questions (see Methods) |

|                                  |                                                                                                                                                                     |                                                            |
|----------------------------------|---------------------------------------------------------------------------------------------------------------------------------------------------------------------|------------------------------------------------------------|
| Liu <i>et al.</i> , 2020         | Children with COVID-19 behaving milder may challenge the public policies: a systematic review and meta-analysis.                                                    | Does not answer any of our 4 posed questions (see Methods) |
| Gaythorpe <i>et al.</i> , 2021   | Children's role in the COVID-19 pandemic: a systematic review of early surveillance data on susceptibility, severity, and transmissibility.                         | Does not answer any of our 4 posed questions (see Methods) |
| Di Cicco <i>et al.</i> , 2021    | Chronic respiratory diseases other than asthma in children: the COVID-19 tsunami                                                                                    | Does not answer any of our 4 posed questions (see Methods) |
|                                  | Clinical adaptations post COVID-19 in LMICs                                                                                                                         | Does not answer any of our 4 posed questions (see Methods) |
| Zhen-Dong <i>et al.</i> , 2020   | Clinical and Transmission Dynamics Characteristics of 406 Children with Coronavirus Disease 2019 in China: A Review.                                                | Does not answer any of our 4 posed questions (see Methods) |
| Abujafer <i>et al.</i> , 2020    | Clinical features, diagnosis, complications, and treatment of multisystem inflammatory syndrome in children MIS-C during the COVID-19 pandemic: a systematic review | Does not answer any of our 4 posed questions (see Methods) |
| Iglesia <i>et al.</i> , 2021     | College students' well-being during the COVID-19 pandemic: A systematic review of the literature                                                                    | Does not answer any of our 4 posed questions (see Methods) |
| Preston <i>et al.</i> , 2022     | Connectedness, Self-Esteem, and Prosocial Behaviors Protect Adolescent Mental Health Following Social Isolation: A Systematic Review.                               | Does not answer any of our 4 posed questions (see Methods) |
| Boyadzhieva <i>et al.</i> , 2020 | Coronavirus disease 2019 (COVID-19) during pregnancy in patients with rheumatic diseases                                                                            | Does not answer any of our 4 posed questions (see Methods) |
| Sanyaolu <i>et al.</i> , 2020    | COVID 19 pandemicity: A global situation report as of June 9, 2020                                                                                                  | Does not answer any of our 4 posed questions (see Methods) |
| Fardin <i>et al.</i> , 2020      | Covid-19 and anxiety: A review of psychological impacts of infectious disease outbreaks                                                                             | Does not answer any of our 4 posed questions (see Methods) |
| Tajbakhsh <i>et al.</i> , 2021   | COVID-19 and cardiac injury: clinical manifestations, biomarkers, mechanisms, diagnosis, treatment, and follow up                                                   | Does not answer any of our 4 posed questions (see Methods) |
| Panakaje <i>et al.</i> , 2022    | COVID-19 and its impact on educational environment in India                                                                                                         | Does not answer any of our 4 posed questions (see Methods) |
| Rocha <i>et al.</i> , 2020       | COVID-19 and patients with immune-mediated inflammatory diseases undergoing                                                                                         | Does not answer any of our 4 posed questions (see Methods) |

|                                       |                                                                                                                                                      |                                                            |
|---------------------------------------|------------------------------------------------------------------------------------------------------------------------------------------------------|------------------------------------------------------------|
|                                       | pharmacological treatments: A rapid living systematic review                                                                                         |                                                            |
| Boechat <i>et al.</i> , 2021          | COVID-19 and pediatric asthma: Clinical and management challenges                                                                                    | Does not answer any of our 4 posed questions (see Methods) |
| Bansal <i>et al.</i> , 2021           | COVID-19 and pregnancy: A scientometric assessment of global publications during 2020-21                                                             | Does not answer any of our 4 posed questions (see Methods) |
| Sameni <i>et al.</i> , 2020           | COVID-19 and Skin Manifestations: An Overview of Case Reports/Case Series and Meta-Analysis of Prevalence Studies.                                   | Does not answer any of our 4 posed questions (see Methods) |
| Nasiri <i>et al.</i> , 2020           | COVID-19 Clinical Characteristics, and Sex-Specific Risk of Mortality: Systematic Review and Meta-Analysis.                                          | Does not answer any of our 4 posed questions (see Methods) |
| Wijayanti <i>et al.</i> , 2020        | Covid-19 in children and policy of the Indonesian government to begins new school year                                                               | Does not answer any of our 4 posed questions (see Methods) |
| Parilli-Troconis <i>et al.</i> , 2020 | COVID-19 Infection and Its Influence in Otorhinolaryngology-Head and Neck Surgery                                                                    | Does not answer any of our 4 posed questions (see Methods) |
| Desye <i>et al.</i> , 2021            | COVID-19 Pandemic and Water, Sanitation, and Hygiene: Impacts, Challenges, and Mitigation Strategies                                                 | Does not answer any of our 4 posed questions (see Methods) |
| Ka Siu <i>et al.</i> , 2020           | COVID-19 prevention and treatment information on the internet: a systematic analysis and quality assessment.                                         | Does not answer any of our 4 posed questions (see Methods) |
| Beesoon <i>et al.</i> , 2020          | COVID-19 Scientific Advisory Group Rapid Evidence Report                                                                                             | Does not answer any of our 4 posed questions (see Methods) |
| Ryan <i>et al.</i> , 2021             | COVID-19, children and schools: overlooked and at risk                                                                                               | Not a systematic review                                    |
| Siedlecki <i>et al.</i> , 2020        | COVID-19: Ophthalmological Aspects of the SARS-CoV 2 Global Pandemic.                                                                                | Does not answer any of our 4 posed questions (see Methods) |
| El Homossany <i>et al.</i> , 2021     | COVID-19-related anxiety among dental students in two dental schools in Saudi Arabia                                                                 | Does not answer any of our 4 posed questions (see Methods) |
| Noruzi <i>et al.</i> , 2022           | Current and Future Perspectives on the COVID-19 Vaccine: A Scientometric Review                                                                      | Does not answer any of our 4 posed questions (see Methods) |
| Caine <i>et al.</i> , 2020            | Current views and understanding in an anaesthetic department surrounding power injection of intravenous contrast via central venous catheters for CT | Does not answer any of our 4 posed questions (see Methods) |

|                                       |                                                                                                                                                     |                                                            |
|---------------------------------------|-----------------------------------------------------------------------------------------------------------------------------------------------------|------------------------------------------------------------|
| Afifah <i>et al.</i> , 2021           | DAMPAK PENDEMI COVID-19 TERHADAP PEMBELAJARAN DI SEKOLAH DASAR                                                                                      | Not a systematic review                                    |
| Al-Ryalat <i>et al.</i> , 2021        | Dedicated COVID-19 Resource Center in Radiology Journals: Its Citation Metrics and Altmetrics Impact                                                | Does not answer any of our 4 posed questions (see Methods) |
| Guo <i>et al.</i> , 2021              | Depression and Coping Styles of College Students in China During COVID-19 Pandemic: A Systemic Review and Meta-Analysis.                            | Does not answer any of our 4 posed questions (see Methods) |
| Jhala <i>et al.</i> , 2021            | Development of a COVID-19 convalescent plasma curriculum amongst students: An initial pilot study                                                   | Does not answer any of our 4 posed questions (see Methods) |
| Vincent <i>et al.</i> , 2021          | Development of a patient decision aid for COVID-19 vaccination with the Comirnaty vaccine                                                           | Does not answer any of our 4 posed questions (see Methods) |
| Moreira <i>et al.</i> , 2021          | Diagnosis of SARS-Cov-2 Infection by RT-PCR Using Specimens Other Than Naso- and Oropharyngeal Swabs: A Systematic Review and Meta-Analysis.        | Does not answer any of our 4 posed questions (see Methods) |
| Fujita-Rohwerder <i>et al.</i> , 2022 | Diagnostic accuracy of rapid point-of-care tests for diagnosis of current SARS-CoV-2 infections in children: a systematic review and meta-analysis. | Does not answer any of our 4 posed questions (see Methods) |
| Anglemyer <i>et al.</i> , 2020        | Digital contact tracing technologies in epidemics: a rapid review.                                                                                  | Does not answer any of our 4 posed questions (see Methods) |
| Tudor Car <i>et al.</i> , 2021        | Digital Health Training Programs for Medical Students: Scoping Review.                                                                              | Does not answer any of our 4 posed questions (see Methods) |
| Ahmady <i>et al.</i> , 2021           | Distance learning strategies in medical education during COVID-19: A systematic review.                                                             | Does not answer any of our 4 posed questions (see Methods) |
| Shimabuku <i>et al.</i> , 2020        | Double burden of excess weight and anemia in Latin American children up to 2019                                                                     | Does not answer any of our 4 posed questions (see Methods) |
| Patel <i>et al.</i> , 2020            | Early epidemiological indicators, outcomes, and interventions of COVID-19 pandemic: A systematic review.                                            | Does not answer any of our 4 posed questions (see Methods) |
| Oliveira <i>et al.</i> , 2021         | Effectiveness of Mobile App-Based Psychological Interventions for College Students: A Systematic Review of the Literature.                          | Does not answer any of our 4 posed questions (see Methods) |
| Iezadi <i>et al.</i> , 2021           | Effectiveness of non-pharmaceutical public health interventions against                                                                             | Does not answer any of our 4 posed questions (see Methods) |

|                                       |                                                                                                                                                       |                                                            |
|---------------------------------------|-------------------------------------------------------------------------------------------------------------------------------------------------------|------------------------------------------------------------|
|                                       | COVID-19: A systematic review and meta-analysis.                                                                                                      |                                                            |
| Wilcha <i>et al.</i> , 2020           | Effectiveness of Virtual Medical Teaching During the COVID-19 Crisis: Systematic Review.                                                              | Does not answer any of our 4 posed questions (see Methods) |
| Adefalu <i>et al.</i> , 2021          | Psychological Implications of Covid-19 Pandemic in College Students-A Systematic Review                                                               | Does not answer any of our 4 posed questions (see Methods) |
| Azab <i>et al.</i> , 2022             | Egyptian neurosurgical publication productivity. A retrospective analysis from 2015 to 2020                                                           | Does not answer any of our 4 posed questions (see Methods) |
| Saha <i>et al.</i> , 2021             | Epidemiological burden of parents being the index cases of COVID-19 infected children.                                                                | Does not answer any of our 4 posed questions (see Methods) |
| Martinoli <i>et al.</i> , 2021        | Estimating SARS-CoV-2 Circulation in the School Setting: A Systematic Review and Meta-Analysis                                                        | Does not answer any of our 4 posed questions (see Methods) |
| Paterson <i>et al.</i> , 2021         | Exploring the impact of COVID-19 on the movement behaviors of children and youth: A scoping review of evidence after the first year.                  | Not a systematic review                                    |
| Danisi <i>et al.</i> , 2021           | Exploring the impact of school closures on the mental health of children in grades K-12 in the United States during the COVID-19 pandemic             | Not a systematic review                                    |
| Regmi <i>et al.</i> , 2021            | Factors Associated with the Implementation of Non-Pharmaceutical Interventions for Reducing Coronavirus Disease 2019 (COVID-19): A Systematic Review. | Does not answer any of our 4 posed questions (see Methods) |
| Carrion-Martinez <i>et al.</i> , 2021 | Family and School Relationship during COVID-19 Pandemic: A Systematic Review.                                                                         | Does not answer any of our 4 posed questions (see Methods) |
| Wang <i>et al.</i> , 2022             | Fear of COVID-19 among college students: A Systematic Review and Meta-Analysis                                                                        | Does not answer any of our 4 posed questions (see Methods) |
| Ishihara <i>et al.</i> , 2021         | Flunking COVID-19 Out of Schools: A Systematic Review of Non-Pharmaceutical Interventions to Minimize Novel Coronavirus-2 in Educational Settings     | Does not answer any of our 4 posed questions (see Methods) |
| Fligor <i>et al.</i> , 2020           | Gastrointestinal Malignancies and the COVID-19 Pandemic: Evidence-Based Triage to Surgery.                                                            | Does not answer any of our 4 posed questions (see Methods) |
| Achmad <i>et al.</i> , 2021           | Gingival Health and Oral Hygiene Measures among Junior High School Children during the Covid-19 Pandemic: A Systematic Review                         | Does not answer any of our 4 posed questions (see Methods) |

|                                        |                                                                                                                                                                                  |                                                            |
|----------------------------------------|----------------------------------------------------------------------------------------------------------------------------------------------------------------------------------|------------------------------------------------------------|
| Do Prado De-Carlo <i>et al.</i> , 2020 | Guidelines for occupational therapy assistance in COVID-19 pandemic and post-pandemic perspectives                                                                               | Does not answer any of our 4 posed questions (see Methods) |
| Kabiri <i>et al.</i> , 2021            | Health-Related Physical Fitness and Activity in Homeschool: A Systematic Review With Implications for Return to Public School.                                                   | Does not answer any of our 4 posed questions (see Methods) |
| Sam <i>et al.</i> , 2020               | High-stakes, remote-access, open-book examinations.                                                                                                                              | Does not answer any of our 4 posed questions (see Methods) |
| Besegato <i>et al.</i> , 2022          | How can biophotonics help dentistry to avoid or minimize cross infection by SARS-CoV-2?                                                                                          | Does not answer any of our 4 posed questions (see Methods) |
| Wilcha <i>et al.</i> , 2020            | How effective is virtual medical teaching during the COVID-19 crisis? A review of the advantages and disadvantages.                                                              | Does not answer any of our 4 posed questions (see Methods) |
| Richardson <i>et al.</i> , 2021        | HPV vaccination in LMICs: A thematic analysis of attitudes and implementation strategies                                                                                         | Does not answer any of our 4 posed questions (see Methods) |
| Ebina-Shibuya <i>et al.</i> , 2021     | Hydroxychloroquine and chloroquine for treatment of coronavirus disease 19 (COVID-19): a systematic review and meta-analysis of randomized and non-randomized controlled trials. | Does not answer any of our 4 posed questions (see Methods) |
| Wang <i>et al.</i> , 2020              | Immunotherapy or other anti-cancer treatments and risk of exacerbation and mortality in cancer patients with COVID-19: a systematic review and meta-analysis.                    | Does not answer any of our 4 posed questions (see Methods) |
| Portillo <i>et al.</i> , 2021          | Impact of COVID-19 on Library Services in US Pharmacy Programs                                                                                                                   | Does not answer any of our 4 posed questions (see Methods) |
| Lopez-Valenciano <i>et al.</i> , 2020  | Impact of COVID-19 Pandemic on University Students' Physical Activity Levels: An Early Systematic Review.                                                                        | Does not answer any of our 4 posed questions (see Methods) |
| Rajmil <i>et al.</i> , 2021            | Impact of lockdown and school closure on children's health and well-being during the first wave of COVID-19: A narrative review                                                  | Not a systematic review                                    |
| Minozzi <i>et al.</i> , 2021           | Impact of social distancing for covid-19 on the psychological well-being of youths: A systematic review of the literature                                                        | Not in English                                             |
| Minozzi <i>et al.</i> , 2021           | Impact of social distancing for Covid-19 on young people: Type and quality of the studies found through a systematic review of the literature                                    | Not in English                                             |



|                                                               |                                                                                                                                                                                                               |                                                            |
|---------------------------------------------------------------|---------------------------------------------------------------------------------------------------------------------------------------------------------------------------------------------------------------|------------------------------------------------------------|
| Mao <i>et al.</i> , 2021                                      | Impact of the COVID-19 pandemic on the mental health and learning of college and university students: A protocol of systematic review and meta-analysis                                                       | Does not answer any of our 4 posed questions (see Methods) |
| Li <i>et al.</i> , 2021                                       | Impact of the COVID-19 Pandemic on the Mental Health of College Students: A Systematic Review and Meta-Analysis.                                                                                              | Does not answer any of our 4 posed questions (see Methods) |
| Bakaloudi <i>et al.</i> , 2021                                | Impact of the first COVID-19 lockdown on body weight: A combined systematic review and meta-analysis                                                                                                          | Does not answer any of our 4 posed questions (see Methods) |
| Spielberger <i>et al.</i> , 2021                              | Intra-Household and Close-Contact SARS-CoV-2 Transmission Among Children - a Systematic Review.                                                                                                               | Does not answer any of our 4 posed questions (see Methods) |
| Mun <i>et al.</i> , 2021                                      | Intraoperative aerosol viral transmission in minimally invasive surgery: a scoping review and impact on clinical guidelines and practice during the onset of the coronavirus disease 2019 (COVID-19) pandemic | Does not answer any of our 4 posed questions (see Methods) |
| Farumi <i>et al.</i> , 2020                                   | Literature Review: Risk Factors Affecting College Student's Mental Disorder During Covid19 Pandemic                                                                                                           | Does not answer any of our 4 posed questions (see Methods) |
| The National Collaborating Centre for Methods and Tools, 2021 | Living Rapid Review Update 3 : What is known about the risk of transmission of COVID-19 within post-secondary institutions and the strategies to mitigate on-campus outbreaks ?                               | Does not answer any of our 4 posed questions (see Methods) |
| Hards <i>et al.</i> , 2021                                    | Loneliness and mental health in children and adolescents with pre-existing mental health problems: A rapid systematic review.                                                                                 | Does not answer any of our 4 posed questions (see Methods) |
| Kaka <i>et al.</i> , 2021                                     | Major Update: Remdesivir for Adults With COVID-19 : A Living Systematic Review and Meta-analysis for the American College of Physicians Practice Points.                                                      | Does not answer any of our 4 posed questions (see Methods) |
| Robinson <i>et al.</i> , 2020                                 | Management of Canadian Pediatric Patients With Glomerular Diseases During the COVID-19 Pandemic: Recommendations From the Canadian Association of Pediatric Nephrologists COVID-19 Rapid Response Team        | Does not answer any of our 4 posed questions (see Methods) |
| Krishnaratne <i>et al.</i> , 2020                             | Measures implemented in the school setting to contain the COVID-19 pandemic: a scoping review.                                                                                                                | Not a systematic review                                    |

|                                    |                                                                                                                                                     |                                                            |
|------------------------------------|-----------------------------------------------------------------------------------------------------------------------------------------------------|------------------------------------------------------------|
| Okuyama <i>et al.</i> , 2021       | Mental Health and Physical Activity among Children and Adolescents during the COVID-19 Pandemic.                                                    | Not a systematic review                                    |
| Zapata-Ospina <i>et al.</i> , 2021 | Mental health interventions for college and university students during the COVID-19 pandemic: a critical synthesis of the literature                | Does not answer any of our 4 posed questions (see Methods) |
| Santabarbara <i>et al.</i> , 2021  | Meta-Analysis of Prevalence of Depression in Dental Students during COVID-19 Pandemic.                                                              | Does not answer any of our 4 posed questions (see Methods) |
| Zhang <i>et al.</i> , 2021         | Mindfulness-based interventions: An overall review                                                                                                  | Does not answer any of our 4 posed questions (see Methods) |
| Fyfe-Johnson <i>et al.</i> , 2021  | Nature contact and children's health: A systematic review                                                                                           | Does not answer any of our 4 posed questions (see Methods) |
| Costa <i>et al.</i> , 2020         | Olfactory and taste disorders in COVID-19: a systematic review.                                                                                     | Does not answer any of our 4 posed questions (see Methods) |
| Papa <i>et al.</i> , 2021          | One year of anatomy teaching and learning in the outbreak: Has the Covid-19 pandemic marked the end of a century-old practice? A systematic review. | Does not answer any of our 4 posed questions (see Methods) |
| Camargo <i>et al.</i> , 2020       | Online learning and COVID-19: a meta-synthesis analysis.                                                                                            | Does not answer any of our 4 posed questions (see Methods) |
| Pan <i>et al.</i> , 2021           | Opening pandemic's box: supporting developing adolescents                                                                                           | Does not answer any of our 4 posed questions (see Methods) |
| Buja <i>et al.</i> , 2021          | Opening Schools and Trends in SARS-CoV-2 Transmission in European Countries.                                                                        | Not a systematic review                                    |
| Jessop <i>et al.</i> , 2020        | Personal protective equipment for surgeons during COVID-19 pandemic: systematic review of availability, usage and rationing.                        | Does not answer any of our 4 posed questions (see Methods) |
| Jefferson <i>et al.</i> , 2020     | Physical interventions to interrupt or reduce the spread of respiratory viruses.                                                                    | Does not answer any of our 4 posed questions (see Methods) |
| Kohler <i>et al.</i> , 2021        | Playing games: A systematic review on teaching health professional students                                                                         | Does not answer any of our 4 posed questions (see Methods) |
| O'Boyle <i>et al.</i> , 2020       | PMD42 The IMPACT of COVID-19 on Telemedicine in Ophthalmology: A Literature Review                                                                  | Does not answer any of our 4 posed questions (see Methods) |
| Van Hattum <i>et al.</i> , 2021    | Post-COVID-19 peri-and myocardial manifestations are less common in athletes than in healthy non-athletes: Findings from a systematic review        | Does not answer any of our 4 posed questions (see Methods) |

|                                        |                                                                                                                                                                   |                                                            |
|----------------------------------------|-------------------------------------------------------------------------------------------------------------------------------------------------------------------|------------------------------------------------------------|
| Zhu <i>et al.</i> , 2021               | Post-secondary Student Mental Health During COVID-19: A Meta-Analysis.                                                                                            | Does not answer any of our 4 posed questions (see Methods) |
| Mosleh <i>et al.</i> , 2021            | Potentials of Antitussive Traditional Persian Functional Foods for COVID-19 Therapy+                                                                              | Does not answer any of our 4 posed questions (see Methods) |
| Payedimarri <i>et al.</i> , 2021       | Prediction Models for Public Health Containment Measures on COVID-19 Using Artificial Intelligence and Machine Learning: A Systematic Review.                     | Does not answer any of our 4 posed questions (see Methods) |
| Citeroni <i>et al.</i> , 2021          | Predictors of toxicity with hydroxychloroquine and chloroquine use: A systematic review                                                                           | Does not answer any of our 4 posed questions (see Methods) |
| Chang <i>et al.</i> , 2021             | Prevalence of anxiety symptom and depressive symptom among college students during COVID-19 pandemic: A meta-analysis.                                            | Does not answer any of our 4 posed questions (see Methods) |
| Silva <i>et al.</i> , 2021             | Prevalence of anxiety, depression, and stress among teachers during the COVID-19 pandemic: A PRISMA-compliant systematic review.                                  | Does not answer any of our 4 posed questions (see Methods) |
| Ozamiz-Etxebarria <i>et al.</i> , 2021 | Prevalence of Anxiety, Depression, and Stress among Teachers during the COVID-19 Pandemic: A Rapid Systematic Review with Meta-Analysis.                          | Does not answer any of our 4 posed questions (see Methods) |
| Ghajarzadeh <i>et al.</i> , 2021       | Prevalence of COVID-19 infection in patients with neuromyelitis optica spectrum disorder (NMOSD): A systematic review and meta-analysis                           | Does not answer any of our 4 posed questions (see Methods) |
| Huang <i>et al.</i> , 2022             | Progress on Pharmaceutical Sciences/Pharmacy Postgraduate Education: a Bibliometric Perspective                                                                   | Does not answer any of our 4 posed questions (see Methods) |
| Mao <i>et al.</i> , 2021               | Protocol: Impact of the COVID-19 pandemic on the mental health and learning of college and university students: a protocol of systematic review and meta-analysis | Does not answer any of our 4 posed questions (see Methods) |
| Heideman <i>et al.</i> , 2021          | Protocols for Managing Food Allergies in Elementary and Secondary Schools                                                                                         | Does not answer any of our 4 posed questions (see Methods) |
| Di Bidino <i>et al.</i> , 2020         | PRS58 IMPACT of Sars-COV-2 on Provided Healthcare. Evidence from the Emergency Phase in Italy                                                                     | Does not answer any of our 4 posed questions (see Methods) |
| Rogers <i>et al.</i> , 2020            | Psychiatric and neuropsychiatric presentations associated with severe coronavirus infections: a systematic review and meta-analysis with                          | Does not answer any of our 4 posed questions (see Methods) |

|                                    |                                                                                                                                                                            |                                                            |
|------------------------------------|----------------------------------------------------------------------------------------------------------------------------------------------------------------------------|------------------------------------------------------------|
|                                    | comparison to the COVID-19 pandemic.                                                                                                                                       |                                                            |
| Adefalu <i>et al.</i> , 2021       | Psychological Implications of Covid-19 Pandemic in College Students-A Systematic Review                                                                                    | Does not answer any of our 4 posed questions (see Methods) |
| Xu <i>et al.</i> , 2021            | Psychological interventions of virtual gamification within academic intrinsic motivation: A systematic review.                                                             | Does not answer any of our 4 posed questions (see Methods) |
| Molleti <i>et al.</i> , 2021       | Rapid Systematic Review of the Impact of School Closures on Child Mental Health amid the COVID-19 Pandemic                                                                 | Not a systematic review                                    |
| Dinnes <i>et al.</i> , 2021        | Rapid, point-of-care antigen and molecular-based tests for diagnosis of SARS-CoV-2 infection                                                                               | Does not answer any of our 4 posed questions (see Methods) |
| Wilt <i>et al.</i> , 2021          | Remdesivir for Adults With COVID-19 : A Living Systematic Review for American College of Physicians Practice Points.                                                       | Does not answer any of our 4 posed questions (see Methods) |
| Hassib <i>et al.</i> , 2021        | Renin-Angiotensin-Aldosterone System Inhibitors and COVID-19: A Meta-Analysis and Systematic Review.                                                                       | Does not answer any of our 4 posed questions (see Methods) |
| Lo Moro <i>et al.</i> , 2020       | Reopening Schools during the COVID-19 Pandemic: Overview and Rapid Systematic Review of Guidelines and Recommendations on Preventive Measures and the Management of Cases. | Does not answer any of our 4 posed questions (see Methods) |
| Melo-Oliveira <i>et al.</i> , 2021 | Reported quality of life in countries with cases of COVID19: a systematic review.                                                                                          | Does not answer any of our 4 posed questions (see Methods) |
| Gao <i>et al.</i> , 2020           | Research Collaboration and Outcome Measures of Interventional Clinical Trial Protocols for COVID-19 in China.                                                              | Does not answer any of our 4 posed questions (see Methods) |
| Karki <i>et al.</i> , 2021         | Risk of infection and contribution to transmission of SARS-CoV-2 in school staff: a systematic review.                                                                     | Does not answer any of our 4 posed questions (see Methods) |
| Irfan <i>et al.</i> , 2021         | Risk of infection and transmission of SARS-CoV-2 among children and adolescents in households, communities and educational settings: A systematic review and meta-analysis | Does not answer any of our 4 posed questions (see Methods) |
| Ouma <i>et al.</i> , 2021          | Role and utility of COVID-19 laboratory testing in low-income and middle-income countries: Protocol for rapid evidence synthesis                                           | Does not answer any of our 4 posed questions (see Methods) |

|                                    |                                                                                                                                                   |                                                            |
|------------------------------------|---------------------------------------------------------------------------------------------------------------------------------------------------|------------------------------------------------------------|
| Rajmil <i>et al.</i> , 2020        | Role of children in the transmission of the COVID-19 pandemic: A rapid scoping review                                                             | Does not answer any of our 4 posed questions (see Methods) |
| Li <i>et al.</i> , 2007            | Role of ventilation in airborne transmission of infectious agents in the built environment - a multidisciplinary systematic review.               | Does not answer any of our 4 posed questions (see Methods) |
| Grothe <i>et al.</i> , 2021        | Rural access to pediatric gastroenterology care                                                                                                   | Does not answer any of our 4 posed questions (see Methods) |
| Wenjing <i>et al.</i> , 2020       | Safety and efficacy of convalescent plasma therapy in severely and critically ill patients with COVID-19: a systematic review with meta-analysis. | Does not answer any of our 4 posed questions (see Methods) |
| Martinoli <i>et al.</i> , 2021     | SARS-CoV-2 circulation in the school setting: A systematic review and meta-analysis                                                               | Does not answer any of our 4 posed questions (see Methods) |
| Kumar <i>et al.</i> , 2021         | SARS-CoV-2 detection in human milk: a systematic review                                                                                           | Does not answer any of our 4 posed questions (see Methods) |
| Lambelet <i>et al.</i> , 2020      | SARS-CoV-2 in the context of past coronaviruses epidemics: Consideration for prenatal care                                                        | Does not answer any of our 4 posed questions (see Methods) |
| Xu <i>et al.</i> , 2021            | SARS-CoV-2 transmission in schools: An updated living systematic review (version 2; November 2020).                                               | Does not answer any of our 4 posed questions (see Methods) |
| Li <i>et al.</i> , 2022            | School closures and reopenings during the COVID-19 pandemic: a scoping review protocol.                                                           | Not a systematic review                                    |
| Alfano <i>et al.</i> , 2021        | School openings and the COVID-19 outbreak in Italy. A provincial-level analysis using the synthetic control method                                | Not a systematic review                                    |
| Lopes-Junior <i>et al.</i> , 2021  | School reopening and risks accelerating the COVID-19 pandemic: A systematic review and meta-analysis protocol                                     | Not a systematic review                                    |
| Exner-Cortens <i>et al.</i> , 2021 | School-Based Suicide Risk Assessment Using eHealth for Youth: Systematic Scoping Review.                                                          | Does not answer any of our 4 posed questions (see Methods) |
| Bond <i>et al.</i> , 2020          | Schools and emergency remote education during the COVID-19 pandemic: A living rapid systematic review.                                            | Does not answer any of our 4 posed questions (see Methods) |
| Sipiyaruk <i>et al.</i> , 2021     | Serious Games and the COVID-19 Pandemic in Dental Education: An Integrative Review of the Literature                                              | Does not answer any of our 4 posed questions (see Methods) |
| Thompson <i>et al.</i> , 2021      | Severe Acute Respiratory Syndrome Coronavirus 2 (SARS-CoV-2) Setting-specific Transmission Rates: A                                               | Does not answer any of our 4 posed questions (see Methods) |

|                                         |                                                                                                                                                                                         |                                                            |
|-----------------------------------------|-----------------------------------------------------------------------------------------------------------------------------------------------------------------------------------------|------------------------------------------------------------|
|                                         | Systematic Review and Meta-analysis.                                                                                                                                                    |                                                            |
| Lameiras-Fernandez <i>et al.</i> , 2021 | Sex Education in the Spotlight: What Is Working? Systematic Review.                                                                                                                     | Does not answer any of our 4 posed questions (see Methods) |
| Hammond <i>et al.</i> , 2021            | Should homes and workplaces purchase portable air filters to reduce the transmission of SARS-CoV-2 and other respiratory infections? A systematic review                                | Does not answer any of our 4 posed questions (see Methods) |
| Viola <i>et al.</i> , 2021              | Social and environmental effects of the COVID-19 pandemic on children                                                                                                                   | Not a systematic review                                    |
| Mousa <i>et al.</i> , 2021              | Social contact patterns and implications for infectious disease transmission - a systematic review and meta-analysis of contact surveys.                                                | Does not answer any of our 4 posed questions (see Methods) |
| Khosravizadeh <i>et al.</i> , 2021      | Social distance capacity to control the COVID-19 pandemic: A systematic review on time series analysis.                                                                                 | Does not answer any of our 4 posed questions (see Methods) |
| -                                       | Society for Acupuncture Research<br>Pandemics, Pain, and Public Health:<br>Roles and Relevance of Traditional East Asian Medicine                                                       | Does not answer any of our 4 posed questions (see Methods) |
| D'angelo <i>et al.</i> , 2021           | Strategies to exiting the COVID-19 lockdown for workplace and school: A scoping review.                                                                                                 | Does not answer any of our 4 posed questions (see Methods) |
| Xiao <i>et al.</i> , 2021               | Suicide Prevention Among College Students Before and During the COVID-19 Pandemic: Protocol for a Systematic Review and Meta-analysis                                                   | Does not answer any of our 4 posed questions (see Methods) |
| Younis <i>et al.</i> , 2021             | Survey of Robotics in Education, Taxonomy, Applications, and Platforms during COVID-19                                                                                                  | Does not answer any of our 4 posed questions (see Methods) |
| Lee <i>et al.</i> , 2021                | Synchronous online learning during movement control order in higher education institutions: a systematic review.                                                                        | Does not answer any of our 4 posed questions (see Methods) |
| Luo <i>et al.</i> , 2021                | Systematic Review and Meta-Analysis of Fear of COVID-19.                                                                                                                                | Does not answer any of our 4 posed questions (see Methods) |
| Walsh <i>et al.</i> , 2022              | Systematic review of current tele-ophthalmology services in New Zealand compared to the four comparable countries of the United Kingdom, Australia, United States of America and Canada | Does not answer any of our 4 posed questions (see Methods) |

|                                     |                                                                                                                                                                               |                                                            |
|-------------------------------------|-------------------------------------------------------------------------------------------------------------------------------------------------------------------------------|------------------------------------------------------------|
| Byrne <i>et al.</i> , 2021          | Systematic review of medical student willingness to volunteer and preparedness for pandemics and disasters.                                                                   | Does not answer any of our 4 posed questions (see Methods) |
| Cachon-Zagalaz <i>et al.</i> , 2020 | Systematic Review of the Literature About the Effects of the COVID-19 Pandemic on the Lives of School Children.                                                               | Does not answer any of our 4 posed questions (see Methods) |
| Oyetade <i>et al.</i> , 2020        | Technology adoption in education: A systematic literature review                                                                                                              | Does not answer any of our 4 posed questions (see Methods) |
| Bui <i>et al.</i> , 2021            | Tele-monitoring in pediatric respiratory diseases                                                                                                                             | Does not answer any of our 4 posed questions (see Methods) |
| Dhillon <i>et al.</i> , 2021        | The accuracy of saliva versus nasopharyngeal and/or oropharyngeal samples for the detection of SARS-CoV-2 in children. A rapid systematic review and meta-analysis            | Does not answer any of our 4 posed questions (see Methods) |
| Ndreu <i>et al.</i> , 2021          | The cold calling method: A systematic review                                                                                                                                  | Does not answer any of our 4 posed questions (see Methods) |
| Qaseem <i>et al.</i> , 2021         | The development of living, rapid practice points: Summary of methods from the scientific medical policy committee of the american college of physicians                       | Does not answer any of our 4 posed questions (see Methods) |
| Veys <i>et al.</i> , 2021           | The effect of hand hygiene promotion programs during epidemics and pandemics of respiratory droplet-transmissible infections on health outcomes: a rapid systematic review.   | Does not answer any of our 4 posed questions (see Methods) |
| Rahayuwati <i>et al.</i> , 2021     | The effectiveness of tele-education for health field university students as a learning method during a covid-19 pandemic: A systematic review                                 | Does not answer any of our 4 posed questions (see Methods) |
| Amate <i>et al.</i> , 2021          | The effects of covid-19 in the learning process of primary school students: A systematic review                                                                               | Does not answer any of our 4 posed questions (see Methods) |
| Hu <i>et al.</i> , 2021             | The effects of the measures against COVID-19 pandemic on physical activity among school-aged children and adolescents (6-17 years) in 2020: A protocol for systematic review. | Not a systematic review                                    |
| Choudhuri <i>et al.</i> , 2021      | The efficacy and safety of hydroxychloroquine (HCQ) in treatment of COVID19 -a systematic review and meta-analysis.                                                           | Does not answer any of our 4 posed questions (see Methods) |

|                                 |                                                                                                                                                                                 |                                                            |
|---------------------------------|---------------------------------------------------------------------------------------------------------------------------------------------------------------------------------|------------------------------------------------------------|
| Cozzi <i>et al.</i> , 2022      | The first winter of social distancing improved most of the health indexes in a paediatric emergency department                                                                  | Does not answer any of our 4 posed questions (see Methods) |
| Liyanage <i>et al.</i> , 2021   | The impact of COVID-19 lockdown on dengue transmission in Sri Lanka; a natural experiment for understanding the influence of human mobility                                     | Does not answer any of our 4 posed questions (see Methods) |
| Ding <i>et al.</i> , 2021       | The impact of COVID-19 on college students' physical activity: A protocol for systematic review and meta-analysis                                                               | Does not answer any of our 4 posed questions (see Methods) |
| Ho <i>et al.</i> , 2020         | The impact of death and dying on the personhood of medical students: a systematic scoping review.                                                                               | Does not answer any of our 4 posed questions (see Methods) |
| Haddad <i>et al.</i> , 2021     | The Impact of Social Media on College Mental Health During the COVID-19 Pandemic: a Multinational Review of the Existing Literature                                             | Does not answer any of our 4 posed questions (see Methods) |
| Marchi <i>et al.</i> , 2021     | The Impact of the COVID-19 Pandemic and Societal Infection Control Measures on Children and Adolescents' Mental Health: A Scoping Review                                        | Not a systematic review                                    |
| Smith <i>et al.</i> , 2020      | The Impact of the COVID-19 Pandemic on Food Insecurity among US College Students, a Systematic Review                                                                           | Does not answer any of our 4 posed questions (see Methods) |
| Araujo <i>et al.</i> , 2021     | The potential impact of the COVID-19 pandemic on child growth and development: a systematic review.                                                                             | Does not answer any of our 4 posed questions (see Methods) |
| Deng <i>et al.</i> , 2021       | The prevalence of depressive symptoms, anxiety symptoms and sleep disturbance in higher education students during the COVID-19 pandemic: A systematic review and meta-analysis. | Does not answer any of our 4 posed questions (see Methods) |
| Wiedenmann <i>et al.</i> , 2021 | The role of children and adolescents in the sars-cov-2 pandemic: A rapid review                                                                                                 | Does not answer any of our 4 posed questions (see Methods) |
| Li <i>et al.</i> , 2020         | The role of children in the transmission of SARS-CoV2: updated rapid review.                                                                                                    | Does not answer any of our 4 posed questions (see Methods) |
| Li <i>et al.</i> , 2020         | The role of children in transmission of SARS-CoV-2: A rapid review.                                                                                                             | Does not answer any of our 4 posed questions (see Methods) |
| Vaselli <i>et al.</i> , 2021    | The seroprevalence of SARS-CoV-2 during the first wave in Europe 2020: A systematic review.                                                                                     | Does not answer any of our 4 posed questions (see Methods) |



|                                  |                                                                                                                                                                                                                                            |                                                            |
|----------------------------------|--------------------------------------------------------------------------------------------------------------------------------------------------------------------------------------------------------------------------------------------|------------------------------------------------------------|
| Petretto <i>et al.</i> , 2021    | The use of distance learning and e-learning in students with learning disabilities: A review on the effects and some hint of analysis on the use during covid-19 outbreak                                                                  | Does not answer any of our 4 posed questions (see Methods) |
| Dickey <i>et al.</i> , 2021      | Toward the use of medical scent detection dogs for COVID-19 screening.                                                                                                                                                                     | Does not answer any of our 4 posed questions (see Methods) |
| Wang <i>et al.</i> , 2020        | Transmission and prevention of SARS-CoV-2                                                                                                                                                                                                  | Does not answer any of our 4 posed questions (see Methods) |
| Viner <i>et al.</i> , 2021       | Transmission of SARS-CoV-2 by children and young people in households and schools: a meta-analysis of population-based and contact-tracing studies.                                                                                        | Does not answer any of our 4 posed questions (see Methods) |
| Clyne <i>et al.</i> , 2022       | Transmission of SARS-CoV-2 by children: a rapid review, 30 December 2019 to 10 August 2020.                                                                                                                                                | Does not answer any of our 4 posed questions (see Methods) |
| Moon <i>et al.</i> , 2021        | Transmission risks of respiratory infectious diseases in various confined spaces: A meta-analysis for future pandemics                                                                                                                     | Does not answer any of our 4 posed questions (see Methods) |
| Bhargava <i>et al.</i> , 2020    | Universal health coverage and tuberculosis care in India in the times of Covid-19: Aligning Ayushman Bharat (National Health Assurance Scheme) to improve case detection, reduce deaths and catastrophic health expenditure                | Does not answer any of our 4 posed questions (see Methods) |
| Viswanathan <i>et al.</i> , 2020 | Universal screening for SARS-CoV-2 infection: a rapid review                                                                                                                                                                               | Does not answer any of our 4 posed questions (see Methods) |
| Kotak <i>et al.</i> 2020         | Use of Tocilizumab in COVID-19: A Systematic Review and Meta-Analysis of Current Evidence.                                                                                                                                                 | Does not answer any of our 4 posed questions (see Methods) |
| Lamb <i>et al.</i> , 2020        | Use of Tracheostomy During the COVID-19 Pandemic: American College of Chest Physicians/American Association for Bronchology and Interventional Pulmonology/Association of Interventional Pulmonology Program Directors Expert Panel Report | Does not answer any of our 4 posed questions (see Methods) |
| Parsons <i>et al.</i> , 2020     | 'viral' virtual education: Constructing a virtual pediatric lab medicine elective for medical students and trainees                                                                                                                        | Does not answer any of our 4 posed questions (see Methods) |
| Perez <i>et al.</i> , 2021       | Virtual implementations to away rotations in otolaryngology during COVID-19                                                                                                                                                                | Does not answer any of our 4 posed questions (see Methods) |

|                                                   |                                                                                                                                           |                                                            |
|---------------------------------------------------|-------------------------------------------------------------------------------------------------------------------------------------------|------------------------------------------------------------|
| Xu <i>et al.</i> , 2022                           | Virtual mindfulness interventions to promote well-being in adults: A mixed-methods systematic review.                                     | Does not answer any of our 4 posed questions (see Methods) |
| Chen <i>et al.</i> , 2020                         | Visual analysis of coronavirus disease 2019 (COVID-19) studies based on bibliometrics                                                     | Does not answer any of our 4 posed questions (see Methods) |
| Nenna <i>et al.</i> , 2021                        | Weighing policymaking: A narrative review of school closures as COVID-19 pandemic-mitigation strategies                                   | Not a systematic review                                    |
| Xu <i>et al.</i> , 2020                           | What is the evidence for transmission of COVID-19 by children in schools? A living systematic review.                                     | Does not answer any of our 4 posed questions (see Methods) |
| Goodwin <i>et al.</i> , 2021                      | Which factors influence the extent of indoor transmission of SARS-CoV-2? A rapid evidence review.                                         | Does not answer any of our 4 posed questions (see Methods) |
| Caroppo <i>et al.</i> , 2021                      | Will nothing be the same again?: Changes in lifestyle during COVID-19 pandemic and consequences on mental health                          | Does not answer any of our 4 posed questions (see Methods) |
| Morgan <i>et al.</i> , 2022                       | Women healthcare workers' experiences during COVID-19 and other crises: A scoping review.                                                 | Does not answer any of our 4 posed questions (see Methods) |
| Ilesanmi <i>et al.</i> , 2021                     | A scope review on the global impact of COVID-19 lockdown on adolescents' health.                                                          | Not a systematic review                                    |
| Kaddoura <i>et al.</i> , 2022                     | A systematic review on machine learning models for online learning and examination systems.                                               | Does not answer any of our 4 posed questions (see Methods) |
| Trivandrum Anandapadmanabhan <i>et al.</i> , 2022 | Effect of COVID-19 on Dental Education: A Review.                                                                                         | Does not answer any of our 4 posed questions (see Methods) |
| Walsh <i>et al.</i> , 2022                        | Effectiveness of rapid antigen testing for screening of asymptomatic individuals to limit the transmission of SARS-CoV-2: A rapid review. | Does not answer any of our 4 posed questions (see Methods) |
| Shankar <i>et al.</i> , 2022                      | Mental health of students of biomedical sciences during the COVID-19 pandemic: a scoping review.                                          | Does not answer any of our 4 posed questions (see Methods) |
| Radwanski <i>et al.</i> , 2022                    | Neurosurgical Education for Medical Students: A Scoping Review.                                                                           | Does not answer any of our 4 posed questions (see Methods) |
| Gunawan <i>et al.</i> , 2022                      | School Reopening during COVID-19 Pandemic: Is It Safe? A Systematic Review                                                                | Not a systematic review                                    |
| Palacios <i>et al.</i> , 2022                     | Measuring Quality Standards for a Consultation-Liaison Psychiatry Service in a Chilean Teaching Hospital                                  | Does not answer any of our 4 posed questions (see Methods) |

|                                       |                                                                                                                                                                    |                                                            |
|---------------------------------------|--------------------------------------------------------------------------------------------------------------------------------------------------------------------|------------------------------------------------------------|
| Martin Delawalla <i>et al.</i> , 2022 | The Impact of the COVID-19 Pandemic on Adolescent Social Media Use, Substance Use, and Depressive Symptoms: A Scoping Review                                       | Not a systematic review                                    |
| Windarwati <i>et al.</i> , 2022       | A narrative review into the impact of COVID-19 pandemic on senior high school adolescent mental health                                                             | Not a systematic review                                    |
| Simkeviciute <i>et al.</i> , 2021     | A Novel Case Study Approach to Undergraduate Research in Post-COVID Times - Mayhem in May                                                                          | Does not answer any of our 4 posed questions (see Methods) |
| Kruger <i>et al.</i> , 2022           | Acute Cough in Adult Patients                                                                                                                                      | Does not answer any of our 4 posed questions (see Methods) |
| Savage <i>et al.</i> , 2022           | Advances in Clinical Cardiology 2021: A Summary of Key Clinical Trials                                                                                             | Does not answer any of our 4 posed questions (see Methods) |
| Furlong <i>et al.</i> , 2021          | An evidence-based synthesis of instructional reading and spelling procedures using telepractice: A rapid review in the context of COVID-19                         | Does not answer any of our 4 posed questions (see Methods) |
| Djurdejevic <i>et al.</i> , 2022      | Anxiety and depressive symptomatology among children and adolescents exposed to the COVID-19 pandemic - A systematic review                                        | Does not answer any of our 4 posed questions (see Methods) |
| Al-Halabi <i>et al.</i> , 2020        | Assessment of paediatric dental guidelines and caries management alternatives in the post COVID-19 period. A critical review and clinical recommendations          | Does not answer any of our 4 posed questions (see Methods) |
| Geng <i>et al.</i> , 2022             | Attitudes of COVID-19 vaccination among college students: A systematic review and meta-analysis of willingness, associated determinants, and reasons for hesitancy | Does not answer any of our 4 posed questions (see Methods) |
| -                                     | BASHH 2022 Abstracts                                                                                                                                               | Not a systematic review                                    |
| Ziade <i>et al.</i> , 2021            | Best practice guidelines for telehealth in rheumatology: An initiative by the arab league of associations for rheumatology                                         | Does not answer any of our 4 posed questions (see Methods) |
| Fleury <i>et al.</i> , 2022           | Canadian Northern and Indigenous health policy responses to the first wave of COVID-19                                                                             | Does not answer any of our 4 posed questions (see Methods) |
| Silverberg <i>et al.</i> , 2022       | Child transmission of SARS-CoV-2: a systematic review and meta-analysis                                                                                            | Does not answer any of our 4 posed questions (see Methods) |

|                                  |                                                                                                                                                                                            |                                                            |
|----------------------------------|--------------------------------------------------------------------------------------------------------------------------------------------------------------------------------------------|------------------------------------------------------------|
| Abbasi <i>et al.</i> , 2021      | Clinical Characteristics and Histopathology of Corona Virus Disease 2020                                                                                                                   | Does not answer any of our 4 posed questions (see Methods) |
| Koszalinski <i>et al.</i> , 2022 | Communication challenges in social isolation, subjective cognitive decline, and mental health status in older adults: A scoping review (2019-2021)                                         | Does not answer any of our 4 posed questions (see Methods) |
| Musa <i>et al.</i> , 2022        | COVID-19 and screen-based sedentary behaviour: Systematic review of digital screen time and metabolic syndrome in adolescents                                                              | Does not answer any of our 4 posed questions (see Methods) |
| Grover <i>et al.</i> , 2022      | COVID-19 and Substance Use: A Scientometric Assessment of Global Publications During 2020 and 2021                                                                                         | Does not answer any of our 4 posed questions (see Methods) |
| Khan <i>et al.</i> , 2020        | COVID-19: A Worldwide, Zoonotic, Pandemic Outbreak                                                                                                                                         | Does not answer any of our 4 posed questions (see Methods) |
| Courtney <i>et al.</i> , 2022    | COVID-19-Driven Improvements and Innovations in Pharmacy Education: A Scoping Review                                                                                                       | Does not answer any of our 4 posed questions (see Methods) |
| Chen <i>et al.</i> , 2022        | Depressive Symptoms Among Children and Adolescents in China During the Coronavirus Disease-19 Epidemic: A Systematic Review and Meta-Analysis                                              | Does not answer any of our 4 posed questions (see Methods) |
| Palo <i>et al.</i> , 2022        | Effective interventions to ensure MCH (Maternal and Child Health) services during pandemic related health emergencies (Zika, Ebola, and COVID-19): A systematic review                     | Does not answer any of our 4 posed questions (see Methods) |
| Sun <i>et al.</i> , 2022         | Effectiveness of different types and levels of social distancing measures: a scoping review of global evidence from earlier stage of COVID-19 pandemic                                     | Not a systematic review                                    |
| Caruso <i>et al.</i> , 2021      | Efficacy and Benefits of Augmented and Virtual Reality Based Learning during COVID-19                                                                                                      | Does not answer any of our 4 posed questions (see Methods) |
| Ostor <i>et al.</i> , 2021       | Efficacy and safety of risankizumab for active psoriatic arthritis: 24-week integrated results from 2 phase 3, randomized, double-blind clinical trials for csdmard-ir and bio-ir patients | Does not answer any of our 4 posed questions (see Methods) |
| Su <i>et al.</i> , 2022          | Enhancement of Online Education to the Teaching Paradigm: Taking Academic Medical Postgraduate Cultivation as an Example                                                                   | Does not answer any of our 4 posed questions (see Methods) |

|                               |                                                                                                                                                                               |                                                            |
|-------------------------------|-------------------------------------------------------------------------------------------------------------------------------------------------------------------------------|------------------------------------------------------------|
| Allaq <i>et al.</i> , 2021    | EPIDEMIOLOGICAL STUDIES OF THE NOVEL CORONAVIRUS (COVID-19) IN LIBYA                                                                                                          | Does not answer any of our 4 posed questions (see Methods) |
| Rahman <i>et al.</i> , 2021   | Estimating the Impact of the Pandemic on Children's Physical Health: A Scoping Review                                                                                         | Not a systematic review                                    |
| Howes <i>et al.</i> , 2022    | Factors influencing the delivery of telerehabilitation for stroke: A systematic review                                                                                        | Does not answer any of our 4 posed questions (see Methods) |
| Hossain <i>et al.</i> , 2022  | Global burden of mental health problems among children and adolescents during COVID-19 pandemic: A systematic umbrella review                                                 | Not a systematic review                                    |
| Sriharan <i>et al.</i> , 2020 | HEALTHCARE SUPERHEROES NEED RESCUE DURING PANDEMICS                                                                                                                           | Does not answer any of our 4 posed questions (see Methods) |
| Kumar <i>et al.</i> , 2022    | Impact of COVID-19 on Gender Equality, Sexual and Reproductive Health Rights of Adolescent Girls and Young Women: A Narrative Review                                          | Does not answer any of our 4 posed questions (see Methods) |
| Sakti <i>et al.</i> , 2022    | Impact of COVID-19 on School Populations and Associated Factors: A Systematic Review                                                                                          | Does not answer any of our 4 posed questions (see Methods) |
| Valenzuela <i>et al.</i> 2022 | Impact of COVID-19 Pandemic on Sleep of Undergraduate Students: A Systematic Literature Review                                                                                | Does not answer any of our 4 posed questions (see Methods) |
| Laing <i>et al.</i> , 2021    | Is undergraduate nursing education sufficient for patient's nutrition care in today's pandemics? Assessing the nutrition knowledge of nursing students: An integrative review | Does not answer any of our 4 posed questions (see Methods) |
| Juneau <i>et al.</i> , 2022   | Lessons from past pandemics: a systematic review of evidence-based, cost-effective interventions to suppress COVID-19                                                         | Does not answer any of our 4 posed questions (see Methods) |
| Kaka <i>et al.</i> , 2022     | Major Update 2: Remdesivir for Adults With COVID-19: A Living Systematic Review and Meta-analysis for the American College of Physicians Practice Points                      | Does not answer any of our 4 posed questions (see Methods) |
| Bestetti <i>et al.</i> , 2022 | Nonpharmaceutical public health interventions to curb the COVID-19 pandemic: a narrative review                                                                               | Not a systematic review                                    |
| Ali <i>et al.</i> , 2022      | PCR80 Informing a Conceptual Framework for a Patient-Centered Value Assessment of Emerging Therapies for Mild/Moderate COVID-19                                               | Does not answer any of our 4 posed questions (see Methods) |

|                                   |                                                                                                                                                                                 |                                                            |
|-----------------------------------|---------------------------------------------------------------------------------------------------------------------------------------------------------------------------------|------------------------------------------------------------|
| Burridge <i>et al.</i> , 2022     | Predictive and retrospective modelling of airborne infection risk using monitored carbon dioxide                                                                                | Does not answer any of our 4 posed questions (see Methods) |
| Li <i>et al.</i> , 2022           | Prevalence and associated factors of depression and anxiety symptoms among college students: a systematic review and meta-analysis                                              | Does not answer any of our 4 posed questions (see Methods) |
| Makwana <i>et al.</i> , 2022      | Prevalence of depression among Indian medical students in COVID-19 pandemic - A meta-analysis                                                                                   | Does not answer any of our 4 posed questions (see Methods) |
| -                                 | Proceedings of the New Zealand Society for the Study of Diabetes Annual Scientific Meeting                                                                                      | Does not answer any of our 4 posed questions (see Methods) |
| -                                 | Psychiatry Update 2021 Spring Abstract                                                                                                                                          | Does not answer any of our 4 posed questions (see Methods) |
| Dinnes <i>et al.</i> , 2022       | Rapid, point-of-care antigen tests for diagnosis of SARS-CoV-2 infection                                                                                                        | Does not answer any of our 4 posed questions (see Methods) |
| Robbins <i>et al.</i> , 2021      | Rheumatology continuing professional development for primary care providers: A systematic review                                                                                | Does not answer any of our 4 posed questions (see Methods) |
| Dadashi <i>et al.</i> , 2022      | SARS-CoV-2 and HIV co-infection; clinical features, diagnosis, and treatment strategies: A systematic review and meta-analysis                                                  | Does not answer any of our 4 posed questions (see Methods) |
| Balachandren <i>et al.</i> , 2022 | SARS-CoV-2 infection in the first trimester and the risk of early miscarriage: A UK population-based prospective cohort study of 3041 pregnancies conceived during the pandemic | Does not answer any of our 4 posed questions (see Methods) |
| Albaker <i>et al.</i> , 2022      | Strengthening medical education during the post-COVID-19 era for building an effective healthcare workforce: A narrative review                                                 | Does not answer any of our 4 posed questions (see Methods) |
| Macleod <i>et al.</i> , 2020      | Surgery during COVID-19 crisis conditions: can we protect our ethical integrity against the odds?                                                                               | Does not answer any of our 4 posed questions (see Methods) |
| Babidge <i>et al.</i> , 2020      | Surgery triage during the COVID-19 pandemic                                                                                                                                     | Does not answer any of our 4 posed questions (see Methods) |
| Alharbi <i>et al.</i> , 2022      | Synergism of CD28 Immune Molecule in Late Immunosuppressive Phase of COVID-19: Effectiveness in Vaccinated Individuals                                                          | Does not answer any of our 4 posed questions (see Methods) |
| Jawad <i>et al.</i> , 2022        | The Impact of the COVID-19 pandemic on a regional Cleft Lip and Palate Surgery Service in the United                                                                            | Does not answer any of our 4 posed questions (see Methods) |

|                                       |                                                                                                                                                                                                                         |                                                            |
|---------------------------------------|-------------------------------------------------------------------------------------------------------------------------------------------------------------------------------------------------------------------------|------------------------------------------------------------|
|                                       | Kingdom; A review of case-load prioritisation and lessons learned                                                                                                                                                       |                                                            |
| Banholzer <i>et al.</i> , 2022        | The methodologies to assess the effects of non-pharmaceutical interventions during COVID-19: a systematic review                                                                                                        | Does not answer any of our 4 posed questions (see Methods) |
| Sasidharanpillai <i>et al.</i> , 2022 | The Short-Term Impact Of COVID-19 Pandemic on Cervical Cancer Screening: A Systematic Review and Meta-Analysis                                                                                                          | Does not answer any of our 4 posed questions (see Methods) |
| Kratzer <i>et al.</i> , 2022          | Unintended consequences of measures implemented in the school setting to contain the COVID-19 pandemic: a scoping review                                                                                                | Not a systematic review                                    |
| Poague <i>et al.</i> , 2022           | Water, Sanitation and Hygiene in Schools in Low-and Middle-Income Countries: A Systematic Review and Implications for the COVID-19 Pandemic                                                                             | Does not answer any of our 4 posed questions (see Methods) |
| Pizarro <i>et al.</i> , 2022          | Workplace interventions to reduce the risk of SARS-CoV-2 infection outside of healthcare settings                                                                                                                       | Does not answer any of our 4 posed questions (see Methods) |
| Moula <i>et al.</i> , 2022            | A Systematic Review of Arts-Based Interventions Delivered to Children and Young People in Nature or Outdoor Spaces: Impact on Nature Connectedness, Health and Wellbeing.                                               | Does not answer any of our 4 posed questions (see Methods) |
| Panda <i>et al.</i> , 2022            | Clinical Outcome of Neonates Born to SARS-CoV-2 Positive Mothers in India: A Systematic Review and Meta-Analysis.                                                                                                       | Does not answer any of our 4 posed questions (see Methods) |
| Sutton <i>et al.</i> , 2022           | Comparing reactogenicity of COVID-19 vaccines: a systematic review and meta-analysis.                                                                                                                                   | Does not answer any of our 4 posed questions (see Methods) |
| Levy <i>et al.</i> , 2022             | Consequences of Social Distancing Measures During the COVID-19 Pandemic First Wave on the Epidemiology of Children Admitted to Pediatric Emergency Departments and Pediatric Intensive Care Units: A Systematic Review. | Does not answer any of our 4 posed questions (see Methods) |
| Mayra <i>et al.</i> , 2022            | COVID-19 and health in children and adolescents in the US: A narrative systematic review.                                                                                                                               | Does not answer any of our 4 posed questions (see Methods) |
| Ma <i>et al.</i> , 2022               | COVID-19 pandemic-related anxiety, stress, and depression among teachers: A systematic review and meta-analysis.                                                                                                        | Does not answer any of our 4 posed questions (see Methods) |

|                                    |                                                                                                                                                                         |                                                            |
|------------------------------------|-------------------------------------------------------------------------------------------------------------------------------------------------------------------------|------------------------------------------------------------|
| Alemayehu <i>et al.</i> , 2022     | Covid-19 Vaccine Acceptance and Determinant Factors among General Public in East Africa: A Systematic Review and Meta-Analysis.                                         | Does not answer any of our 4 posed questions (see Methods) |
| Saito <i>et al.</i> , 2022         | Evaluation of postgraduate rural medical training programs and implications for rural workforce development: a systematic review.                                       | Does not answer any of our 4 posed questions (see Methods) |
| Parveen <i>et al.</i> , 2022       | Identifying the Leadership Challenges of K-12 Public Schools During COVID-19 Disruption: A Systematic Literature Review.                                                | Does not answer any of our 4 posed questions (see Methods) |
| Renson <i>et al.</i> , 2022        | Interventions on Socioeconomic and Racial Inequities in Respiratory Pandemics: a Rapid Systematic Review.                                                               | Does not answer any of our 4 posed questions (see Methods) |
| Li <i>et al.</i> , 2022            | Knowledge, attitudes, and practices towards COVID-19 among college students in China: A systematic review and meta-analysis.                                            | Does not answer any of our 4 posed questions (see Methods) |
| Oliveira <i>et al.</i> , 2022      | Mental health effects prevalence in children and adolescents during the COVID-19 pandemic: A systematic review.                                                         | Does not answer any of our 4 posed questions (see Methods) |
| Gozdzielewska <i>et al.</i> , 2022 | The effectiveness of hand hygiene interventions for preventing community transmission or acquisition of novel coronavirus or influenza infections: a systematic review. | Does not answer any of our 4 posed questions (see Methods) |
| Codispoti <i>et al.</i> , 2022     | The Role of Access and Cost-Effectiveness in Managing Asthma: A Systematic Review.                                                                                      | Does not answer any of our 4 posed questions (see Methods) |
| Drumheller <i>et al.</i> , 2022    | Unprecedented times and uncertain connections: A systematic review examining sleep problems and screentime during the COVID-19 pandemic.                                | Does not answer any of our 4 posed questions (see Methods) |
