# Supplementary material
Source: HighWire-hosted journal article supplement (https://ebm.bmj.com/content/28/3/164)
Supplement: inline-supplementary-material-3 [file inline-supplementary-material-3.xlsx]

## Sheet: School closures efficacy
	Only the SRs and primary studies assessing the impact of school closures on COVID-19 transmission/morbidity/mortality
	Walsh et al.	Ayouni et al.	Talic et al.	Nussbaumer-Streit et al.	Chaabane et al.	Mendez-Brito et al.	Caini et al.	NCCMT et al.	Muhammed	Viner et al. (2020)	Suk et al.
	Auger, Shah, Richardson	Cowling, Ali, Ng	Auger, Shah, Richardson	Geng, Xu, Wang	Angoulvant, Ouldali, Yang	Banholzer, Van Weenen, Kratzwald	Desmet, Ekinci, Wouters	Ulyte, Radtke, Abela	Prem, Liu, Russell	Tian, Liu, Li	Koo, Cook, Park
	Banholzer, van, Kratzwald	Jüni, Rothenbühler, Bobos	Vlachos, Hertegård, Svaleryd	Koo, Cook, Park		Banholzer, van Weenen, Lison	Szépfalusi, Schmidthaler, Sieber	Ladhani, Ireland, Baawuah	Bayham, Fenichel	Lai, Ruktanonchai, Zhou	Bayham, Fenichel
	Brauner, Mindermann, Sharma	Cheng, Wong, Chuang	Iwata, Doi, Miyakoshi	Kucharski, Klepac, Conlan	100% unique studies	Brauner, Mindermann, Sharma	Mossong, Mombaerts, Veiber	Goldfarb, Mâsse, Watts	Kim, Kim, Peck	Prem, Liu, Russel	Zhang, Litvinova, Liang
	Chernozhukov, Kasahara, Schrimpf	Krishnamachari, Morris, Zastrow	Liu, Xu, Li	Wu, Li, Li		Chernozhukov, Kasahara, Schrimpf	Kriger, Lustig, Cohen	Gettings, Gold, Kimball	Zhang, Litvinova, Yu	Cowling, Ali, Ng	Prem, Liu, Russell
	Courtemanche, Garuccio, Le		Guo, Chan, Lin	Fang, Nie, Penny		Courtemanche, Garuccio, Le	Lübke, Schupp, Bredahl	Gandini, Rainisio, Iannuzzo	Chang, Wu, Chang	Kwok, Li, Chan	Kim, Kim, Peck
	Dreher, Spiera, McAuley	50% unique studies		Ferguson, Laydon, Nedjati-Gilani		Deb, Furceri, Ostry	Hommes, van Loon, Thielecke	Hershow, Wu, Lewis	Esposito, Principi	Ferguson, Laydon, Nedjati-Gilani	Chin, Huynh, Lo
	Garchitorena, Gruson, Cazelles		60% unique studies			Duhon, Bragazzi, Kong	Gillespie, Meyers, Lachmann	Berke, Newman, Jemsby	Vanhems		Abdollahi, Haworth-Brockman, Keynan
	Hsiang, Allen, Annan-Phan			67% unique studies		Ebrahim, Ashworth, Noah	Volpp, Kraut, Ghosh	Gold, Gettings, Kimball	Mahase	67% unique studies	Auger, Shah, Richardson
	Jamison, Bundy, Jamison					Esra, Jamieson, Fox	Cooper, Zulu, Jankeel	Rubin, Eisen, Collins
	Klimek-Tulwin, Tulwin					Flaxman, Mishra, Gandy	Hoch, Vogel, Eberle	Young, Eyre, Kendrick	63% unique studies		25% unique studies
	Krishnamachari, Dsida, Zastrow					Fountoulakis, Fountoulakis, Koupidis	Villani, Coltella, Ranno	Oster
	Li, Campbell, Kulkarni					Islam, Sharp, Chowell	Doron, Ingalls, Beauchamp	Oster, Jack, Halloran
	Liu, Morgenstern, Kelly					Jüni, Rothenbühler, Bobos	Bordi, Parisi, Sberna	Lessler, Grabowski, Grantz
	Papadopoulos, Donkov, Charitopoulos					Leffler, Ing, Lykins	Liguria	van den Berg, Schechter-Perkins, Jack			Average unique studies (%):
	Piovani, Christodoulou, Hadjidemetriou					Li, Campbell, Kulkarni	Judd	Sebastiani, Palù			65.9091
	Rauscher					Li, Li, Rice	Crowe, Schnaubelt, SchmidtBonne	Bignami-van Assche, Boujija, Fisman
	Stokes, Turner, Anselmi					Liu, Morgenstern, Kelly	Kriemler, Ulyte, Ammann	Perramon, Soriano-Arandes, Pino			Legend:
	Wu, Killeen, Nikutta					Olney, Smith, Sen	Pesaro 1				Unique
	Yang, Huang, Garcia-Carreras					Papadopoulos, Donkov, Charitopoulos	L'Aquila	82% unique studies			Duplicates
	Yehya, Venkataramani, Harhay					Piovani, Christodoulou, Hadjidemetriou	Pesaro 2				Triplicates
	Zeilinger, Nader, Jomar					Pozo-Martin, Weishaar, Cristea	Sassa
	Gandini, Rainisi, Iannuzzo					Siedner, Harling, Reynolds	Tönshoff, Müller, Elling
	Iwata, Doi, Miyakoshi					Stokes, Turner, Anselmi	Armann, Kirsten, Galow
	Matzinger, Skinner					Wibbens, Koo, McGahan	Lachassinne, de Pontual, Caseris
	Neidhofer, Neidhofer					Wong, Huang, Teoh	Ulyte, Radtke, Abela
	Shah, Ray, Holy						Macartney, Quinn, Pillsbury
	Stage, Shingleton, Ghosh					60% unique studies	Danis, Epaulard, Bénet
	Jüni, Rothenbühler, Bobos						Yoon, Kim, Park
	Walach, Hockertz						Heavey, Casey, Kelly
	Wong, Huang, Teoh						Ehrhardt, Ekinci, Krehl
	Beesley						Stein-Zamir, Abramson, Shoob
	Ehrhardt, Ekinci, Krehl						Jordan, Fernandez de Sevilla, Fumado
	Harris, Ziedan, Hassig						Nelson, McKune, Ryan
	Ingelbeen, Peckeu, Laga						Doyle, Kendrick, Troelstrup
	Isphording, Lipfert, Pestel						Brandal, Ofitserova, Meijerink
	Sruthi, Biswal, Joshi						Larosa, Djuric, Cassinadri
	Stein-Zamir, Abramson, Shoob						Gettings, Gold, Kimball
	Bjork, Mattisson, Ahlbom						Hershow, Wu, Lewis
	Pluemper, Neumayer						Dawson, Worrell, Malone
	64% unique studies						87% unique studies

## Sheet: Learning
	Only the SRs and primary studies assessing the impact of COVID-19 school closures on learning/achievement
	Chaabane et al.	Bond et al.	Panagouli et al.	Hammerstein et al.
	Ijadi-Maghsoodi, Harrison, Kelman	Agustin Mawarni, Ratnasari, Handayani	Amelia, Kadarisma, Fitriani	Clark, Nong, Zhu
	Masonbrink, Hurley	Al Salman, Alkathiri, Bawaneh	Andrew, Cattan, Costa Dias	Depping, Lücken, Musekamp
	Mayurasakorn, Pinsawas, Mongkolsucharitkul	Aldossry	Bansal, Ghate, Bhattacharya	Engzell, Frey, Verhagen		Average unique studies (%):
		Almarashdi, Jarrah	Becker, Breaux, Cusick	Gore, Fray, Miller		89
	100% unique studies	Álvarez-Guerrero, Lopez de Aguileta, Racionero-Plaza	Bobo, Lin, Acquaviva	Kuhfeld, Soland, Tarasawa
		Amelia, Kadarisma, Fitriani	Bubb, Jones	Maldonado, De Witte		Legend:
		Ang, Wu	Dong, Cao, Li	Meeter		Unique
		Asanov, Flores, McKenzie	Hebert, Goodrich, Namkung	Schult, Mahler, Fauth		Duplicates
		Asvial, Mayangsari, Yudistriansyah	Kuhfeld, Soland, Tarasawa	Spitzer, Musslick
		Atmojo, Nugroho	Maldonado, De Witte	Tomasik, Helbling, Moser
		Azhari, Fajri	Moghli, Shuayb	van der Velde, Sense, Spijkers
		Babinčáková, Bernard	Putri, Purwanto, Pramono
		Balkist, Agustiani	Sintema	91% unique studies
		Baptista, Costa, Martins	Tomasik, Helbling, Moser
		Becker, Breaux, Cusick	Zhang, Zhou, Xia
		Bhattarai	Zhao, Guo, Xiao
		Bhaumik, Priyadishini	Banerjee, Khan, Kesavan
		Bruin	Baschenis, Farinotti, Zavani
		Budianto, Arifani	Catalano, Torff, Anderson
		Cheung	Clark, Nong, Zhu
		Chirinda, Ndlovu, Spangenber	Cui, Zhang, Wang
		Chiu	Engzell, Frey, Verhagen
		Clausen, Bunte, Robertson	Gore, Fray, Miller
		Code, Ralph, Forde	Hernawati, Asep Bayu, Nazeri
		Dema, Chogyel, Wangdi	Lichand, Carlos, Onicio
		Dietrich, Patzina, Lerche	Ma, Idris, Zhang
		Dorji	Mælan, Gustavsen, Stranger-Johannessen
		Easterly, Humphrey, Roberts	Meeter
		Education Scotland	Patarapichayatham, Locke, Lewis
		El Iq Bali, Mursrifah	Poulain, Meigen, Sobek
		Ferraro, Ambra, Aruta	Sabates, Carter, Stern
		Gordy, Sparkmon, Imeri	Scarpellini, Segre, Cartabia
		Hira, Anderson	Schult, Mahler, Fauth
		Hodgen, Taylor, Jacques	Sibley, Ortiz, Gaias
		Hu, Huang	Soriano-Ferrer, Morte-Soriano, Begeny
		Jayathirtha, Fields, Kafai	Spitzer, Musslick
		Jeong, So	Siachpazidou, Kotsiou, Chatziparasidis
		Kaden	Steinmayr, Lazarides, Weidinger
		Kelley	Tus
		Kochan	Vainikainen, Oinas, Ahtiainen
		Korzycka, Bojjo, Radiukiewicz	van der Velde, Sense, Spijkers
		Lansangan	Yayci, Kendirci
		Lawrence, Fakuade
		Lepp, Aaviku, Leijen	69% unique studies
		Mælan, Gustavsen, Stranger-Johannessen
		Makamure, Tsakeni
		Nawawi, Sukardi, Handayani Isra
		Niemi, Kousa
		Agustian, Dwi, Siti
		Nurliani, Sinaga, Rusdiana
		Nusser
		Okebukola, Suwadu, Oladejo
		Oraif, Elyas
		Pelikan, Lüftenegger, Holzer
		Pirrone, Varrasi, Platania
		Poláková, Klímová
		Primdahl, Borsch, Jervelund
		Rahayu, Wirza
		Rap, Feldman-Maggor, Aviran
		Rosayanti, Hardiana
		Rusmansyah, Hayati, Winarti
		Schaefer, Abrams, Kurpis
		Shidiq, Permanasari, Hernani
		Sibanda, Mathwasa
		Simanjuntak, Silalahi, Sihombing
		Suliani, Juniati, Ulfah
		Suryana
		Tong, Wang
		Tran, Ho, Pham
		Trung, Hoang, Nguyen
		Turchi, Bondar, Aguilar
		Velichová, Orbánová, Kúbeková
		Weinhandl, Lavicza, Houghton
		Willermark
		Yan et al
		Yan
		Yang
		Yates, Starkey, Egerton
		Zasko, Agung
		Zorčič
		96% unique studies

## Sheet: Mental health 
	Only the SRs and primary studies assessing the impact of COVID-19 school closures on mental health
	Meherali et al.	Samji et al.	Viner et al. (2022)	Chaabane et al.	Chai et al.	Zhang et al.	Lehmann et al.	Elharake et al.
	Buzzi, Tucci, Ciprandi	Abawi, Welling, van den Eynde	Isumi, Doi, Yamaoka	Masonbrink, Hurley	Dai, Liu, Liu	Mo, Yan, Li	Larsen, Helland, Holt	Chen, Zheng, Liu
	Chen, Zheng, Liu	Abdulah, Abdulla, Liamputtong	The Children’s Society	Kılınçel, Kılınçel, Muratdağ	Liu, Yang, Zhang	Lin, Liu	Lee	Duan, Shao, Wang
	Duan, Shao, Wang	Ademhan Tural, Emiralioglu, Tural Hesapcioglu	Levita, Gibson Miller, Hartman	Isumi, Doi, Yamaoka	Li, Wang, Yang	Tang, Ying	Domínguez-Álvarez, López-Romero, Isdahl-Troye	Liang, Ren, Cao
	Ellis, Dumas, Forbes	Adıbelli, Sümen	Odd, Sleap, Appleby	Di Giorgio, Di Riso, Mioni	Wang, Yang, Li	He, Chen, Song	McMahon, Gallagher, Walsh	Xie, Xue, Zhou
	Liang, Ren, Cao	Alamrawy, Fadl, Khaled	Pearcey, Shum, Waite		Tang, Ying	Wang, Xu	Tang, Xiang, Cheung	Tang, Xiang, Cheung
	Liu, Liu, Liu	Alivernini, Manganelli, Girelli	Pearcey, Shum, Dodd	25% unique studies	Wang, Xu	Yu, Zeng, Lu	Takahashi, Honda
	Liu, Luo, Li	Alonso-Martínez, Ramírez-Vélez, García-Alonso	Watson, Sarica, Parkinson		Zhou, Zhang, Wang	Tang, Pang	Moulin, El-Aarbaoui, Bustamante	0% unique studies
	Oosterhoff, Palmer, Wilson	Alshahrani, Elyamany, Sedick	Widnall, Winstone, Mars		Xie, Xue, Zhou	Zhou, Zhang, Wang	Tso, Wong, Tung
	Saurabh, Ranjan	Amorim, Catarino, Miragaia	Russell, Hutchison, Tambling		Tang, Xiang, Cheung	Li, Wang, Yang	Morgül, Kallitsoglou, Essau
	Tian, Li, Tian	Amran	Chen, Cheng, Wu		Dong, Yang, Lu	Cao, Liu, Tang	Cellini, Di Giorgio, Mioni
	Wang, Pan, Wan	Anbarasu, Bhuvaneswari	Duan, Shao, Wang		Duan, Shao, Wang	Wang, Yang, Li		Average unique studies (%):
	Zhou, Zhang, Wang	Asbury, Fox, Deniz	Qi, Liu, Chen		Liu, You, Lu		80% unique studies	47.875
	Xie, Xue, Zhou	Banati, Jones, Youssef	Xie, Xue, Zhou			64% unique studies
		Bothara, Raina, Carne	Zheng, Li, Zhang		42% unique studies			Legend:
	23% unique studies	Breaux, Dvorsky, Marsh	Zhou, Yuan, Qi					Unique
		Buzzi, Tucci, Ciprandi	Zhou, Zhang, Wang					Duplicates
		Cacioppo, Bouvier, Bailly	Di Giorgio, Di Riso, Mioni					Triplicates
		Cao, Huang, Si	Nastro, Tolone, Serra					Quadruplicates
		Chahal, Kirshenbaum, Miller	Segre, Campi, Scarpellini					Quintuplicates
		Cheek, Craig, West	Kılınçel, Kılınçel, Muratdağ
		Chen, Chen, Pakpour	Gallagher, Walsh, O’Connor
		Chen, Cheng, Wu	Roy, Tiwari, Kanchan
		Chen, She, Qin	Ellis, Dumas
		Chi, Liang, Chen	Garcia de Avila, Hamamoto Filho, Jacob
		Colizzi, Sironi, Antonini	Yeasmin, Banik, Hossain
		Commodari, La Rosa
		Conte, Baglioni, Valente	60% unique studies
		Conti, Sgandurra, De Nicola
		Crescentini, Feruglio, Matiz
		Cusinato, Iannattone, Spoto
		de Avila, Filho, da Silva Jacob
		de Matos, Aidar, de Almeida-Neto
		Diaz de Neira, Blasco-Fontecilla, Garcia Murillo
		Duan, Shao, Wang
		Dumas, Ellis, Litt
		Ellis, Dumas, Forbes
		Esposito, Giannitto, Squarcia
		Evans, Mikocka-Walus, Klas
		Ezpeleta, Navarro, de la Osa
		Ferrando, Klepacz, Lynch
		Fish, McInroy, Paceley
		Fitzpatrick, Carson, Weisz
		Fontenelle-Tereshchuk
		Gadermann, Thomson, Richardson
		Gassman-Pines, Ananat, Fitz-Henley
		Giannopoulou, Efstathiou, Triantafyllou
		Glynn, Davis, Luby
		Gotlib, Borchers, Chahal
		Graziola, Garone, Di Criscio
		Guo, Fu, Liu
		Idoiaga, Berasategi, Eiguren
		Janssen, Kullberg, Verkuil
		Jefsen, Rohde, Nørremark
		Jiao, Wang, Liu
		Kılınçel, Kılınçel, Muratdağı
		Lee, Ward, Chang
		Leeb, Bitsko, Radhakrishnan
		Leff, Setzer, Cicero
		Li, Zhang, Wang
		Liebana-Presa, Martinez-Fernandez, Benitez-Andrades
		Liu, Liu, Liu
		Lu, Chi, Liang
		Luthar, Ebbert, Kumar
		Magson, Freeman, Rapee
		Mallik, Radwan
		Martinelli, Strisciuglio, Fedele
		Masi, Mendoza Diaz, Tully
		Masuyama, Shinkawa, Kubo
		Matovu, Kabwama, Ssekamatte
		McElroy, Patalay, Moltrecht
		Munasinghe, Sperandei, Freebairn
		Murata, Rezeppa, Thoma
		Nonweiler, Rattray, Baulcomb
		Oosterhoff, Palmer, Wilson
		O’Sullivan, Clark, McGrane
		Patra, Patro, Acharya
		Paulauskaite, Farris, Spencer
		Pons, Ramis, Alcaraz
		Qi, Liu, Chen
		Qi, Zhou, Guo
		Rauschenberg, Schick, Goetzl
		Ravens-Sieberer, Kaman, Erhart
		Ravens-Sieberer, Kaman, Otto
		Ren, He, Bian
		Rogers, Ha, Ockey
		Romero, López-Romero, Domínguez-álvarez
		Sama, Kaur, Thind
		Saurabh, Ranjan
		Sciberras, Patel, Stokes
		Scott, Rivera, Rushing
		Seçer, Ulas
		Shah, Kaul, Shah
		Shek, Zhao, Dou
		Spinelli, Lionetti, Pastore
		Spinelli, Lionetti, Setti
		Storch, Sheu, Guzick
		Tanaka, Okamoto
		Tang, Deng, Glik
		Theis, Campbell, De Leeuw
		Tromans, Chester, Harrison
		Tso, Wong, Tung
		Vallejo-Slocker, Fresneda, Vallejo
		Waller, Powell, Rodriguez
		Wiguna, Anindyajati, Kaligis
		Xiang, Yamamoto, Mizoue
		Xie, Xue, Zhou
		Xue, Xie, Liu
		Yeasmin, Banik, Hossain
		Yue, Zang, Le
		Zhang, Shuai, Yu
		Zhang, Ye, Fu
		Zhang, Zhang, Fang
		Zhou, Yuan, Qi
		Zhou, Wang, Yang
		Zhou, Zhang, Wang
		Zorcec, Jakovska, Micevska
		89% unique studies

## Sheet: Physical health 
	Only the SRs and primary studies assessing the impact of COVID-19 school closures on physical health
	Viner et al. (2022)	Chaabane et al.	Chang et al.
	Dunton, Do, Wang	An	Agha, Alharbi, Almohammadi
	Roy, Tiwari, Kanchan	Masonbrink, Hurley	Cipolla, Curatola, Ferretti
	Watson, Sarica, Parkinson	Mayurasakorn, Pinsawas, Mongkolsucharitkul	Al Hourani, Alkhatib, Abdullah		Average unique studies (%):
	Pietrobelli, Pecoraro, Ferruzzi		Jarnig, Jaunig, van Poppel		85
	Segre, Campi, Scarpellini	67% unique studies	Kim, Kwon, Choe
	López-Bueno, López-Sánchez, Casajús		Marigliano, Maffeis		Legend:
	An		Mulugeta, Hoque		Unique
	Baysun, Akar		Nassar, Allam, Shata		Duplicates
			Qiu, He, Qiao
	88% unique studies		Di Riso, Bertini, Spaggiari
			Wahl-Alexander, Camic
			Yang, Guo, Ao
			100% unique studies

## Sheet: Sleep
	Only the SRs and primary studies assessing the impact of COVID-19 school closures on sleep
	Viner et al. 2022	Chaabane et al.	Sharma et al.
	Falkingham, Evandrou, Qin	Di Giorgio, Di Riso, Mioni	Guerrero, Vanderloo, Rhodes
	Watson, Sarica, Parkinson		Moore, Faulkner, Rhodes
	Di Giorgio, Di Riso, Mioni	0% unique studies	Mitra, Moore, Gillespie		Average unique studies (%):
	López-Bueno, López-Sánchez, Casajús		Medrano, Cadenas-Sanchez, Oses		42.3333
	Dellagiulia, Lionetti, Fasolo		Baptista, Prado, Perazzo
	Segre, Campi, Scarpellini		Zhou, Wang, Yang		Legend:
	Zhou, Yuan, Qi		Zhou, Yuan, Qi		Unique
	Zhou, Wang, Yang		Rome, Sinai, Sevitt		Duplicates
	Roy, Tiwari, Kanchan		López-Bueno, López-Sánchez, Casajús
	Pietrobelli, Pecoraro, Ferruzzi
			67% unique studies
	60% unique studies

## Sheet: Domestic violence
	Only the SRs and primary studies assessing the impact of COVID-19 school closures on domestic violence
	Viner et al. (2022)	Kourti et al.
	Baron, Goldstein, Wallace	Baron, Goldstein, Wallace
	Bhopal, Buckland, McCrone	Roca, Melgar, Gairal-Casadó
	Garstang, Debelle, Anand	Sidpra, Abomeli, Hameed
		Armbruster, Klotzbücher		Average unique studies (%):
	67% unique studies	Brown, Doom, Watamura		73.5
		80% unique studies		Legend:
				Unique
				Duplicates

## Sheet: In-school mitigations
	Only the SRs and primary studies assessing the impact of COVID-19 in-school mitigations on transmission/morbidity/mortality
	Krishnaratne et al.	NCCMT	Vardavas et al.
	Álvarez, Cancino, Castillo	Ulyte, Radtke, Abela	Lopez, Hill, Antezano
	Aspinall, Sparks, Cooke	Ladhani, Ireland, Baawuah	Heavey, Casey, Kelly
	Baxter, Oruc, Keskinocak	Goldfarb, Mâsse, Watts	Danis, Epaulard, Bénet
	Bershteyn, Kim, McGillen	Gettings, Gold, Kimball	Yung, Kam, Chong
	Burns, Gutfraind	Gandini, Rainisio, Iannuzzo	Macartney, Quinn, Pillsbury
	Campbell, Uppal, Oxlade	Hershow, Wu, Lewis	Stein-Zamir, Abramson, Shoob
	Cohen, Mistry, Kerr	Berke, Newman, Jemsby	Link-Gelles, DellaGrotta, Molina
	Curtius, Granzin, Schrod	Gold, Gettings, Kimball	Ehrhardt, Ekinci, Krehl
	Di Domenico, Pullano, Sabbatini	Rubin, Eisen, Collins	Brandal, Ofitserova, Meijerink
	España, Cavany, Oidtman	Young, Eyre, Kendrick	Gold, Gettings, Kimball
	Germann, Smith, Dauelsberg	Oster	Larosa, Djuric, Cassinadri
	Gill, Goyal, Hotchkiss	Oster, Jack, Halloran	Yoon, Kim, Park
	Head, Andrejko, Cheng	Lessler, Grabowski, Grantz	Pray, Gibbons-Burgener, Rosenberg	Average unique studies (%):
	Hoehl, Schenk, Rudych	van den Berg, Schechter-Perkins, Jack	Blaisdell, Cohn, Pavell	100
	Isphording, Lipfert, Pestel	Sebastiani, Palù
	Jones	Bignami-van Assche, Boujija, Fisman	100% unique studies	Legend:
	Kaiser, Kretschmer, Leszczensky	Perramon, Soriano-Arandes, Pino		Unique
	Keeling, Tildesley, Atkins			Duplicates
	Kraay, Hayashi, Berendes	100% unique studies
	Landeros, Ji, Lange
	Lazebnik, Bunimovich-Mendrazitsky
	Lee, Hanley, Nowak
	Lyng, Sheils, Kennedy
	Mauras, Cohen-Addad, Duboc
	Monod, Blenkinsop, Xi
	Munday, Sherratt, Meakin
	Naimark, Mishra, Barrett
	Panovska-Griffiths, Kerr, Stuart
	Panovska-Griffiths, Kerr, Waites
	Phillips, Browne, Anand
	Rozhnova, van Dorp, Bruijning-Verhagen
	Shelley, Chadwick, Manore
	Simonsen, Ruge, Quaade
	Sruthi, Biswal, Saraswat
	Tupper, Colijn
	Vlachos, Hertegård, Svaleryd
	Williams, Yao, Pal
	Zhang, Litvinova, Liang
	100% unique studies
